# Supplementary material for: Circulating tumor DNA sequencing in colorectal cancer patients treated with first-line chemotherapy with anti-EGFR
Source: Research Square preprint supplement (doi:10.21203/rs.3.rs-411756/v1), 2021-04-14
Supplement: Supplementary file 5 [file a1d32aa80415bc1795dd93ae.docx]

**Supplementary Materials**

**Supplementary Table 1.** Summary of collecting samples

**Supplementary Table 2.** Summary of panel sequencing statistics

**Supplementary Table 3.** 230 ctDNA mutations at baseline from total 93 patients

**Supplementary Table 4.** Tissue and baseline ctDNA mutations in 58 patients

**Supplementary Table 5.** 54 ctDNA mutations only detected at disease progression

**Supplementary Figure. 1.** Schematic diagram of the data analysis.

**Supplementary Figure. 2.** Comparison between detection of baseline ctDNA mutations for (a) the largest tumor size (mm) and (b) baseline cfDNA concentration (ng/ml).

**a**

**b**

**Supplementary Figure. 3.** Correlation between tumor burden (defined as the largest target length, mm) and (a) baseline average VAF (%), (b) baseline cfDNA concentration (ng/ml) and (c) VAF (%) x cfDNA conc. (ng/ml).

**a**

**b**

**c**

**Supplementary Figure. 4.** Clinical significance of the mutations which were newly detected at disease progression by using annotation from the ClinVar database
